# Supplementary material for: Multiple Herpes Simplex Virus-1 (HSV-1) Reactivations Induce Protein Oxidative Damage in Mouse Brain: Novel Mechanisms for Alzheimer’s Disease Progression
Source: MDPI journal article supplement (doi:10.3390/microorganisms8070972), 2020-06-29
Supplement: s1 [file s1]

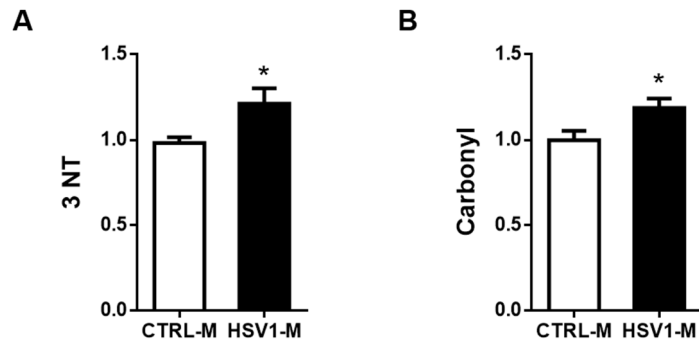

**Figure 1.** Densitometric analysis of total and protein-specific levels of protein 3-nitrotyrosine (3 NT) and protein carbonyls (PC) in the brain of mice representing an in vivo model of recurrent HSV-1 reactivation. Graphs showing the densitometric analysis of immunoblots for 3NT (A) and PC (B) protein levels in cortical lysates from HSV1-M or CTRL-M ( $n = 6$  for each group) sacrificed after seven cycles of TS at 13 months of age. Data are shown as fold increase compared to CTRL-M. Error bars represent SEM, (\*  $p < 0.05$  assessed by Student's t-test).

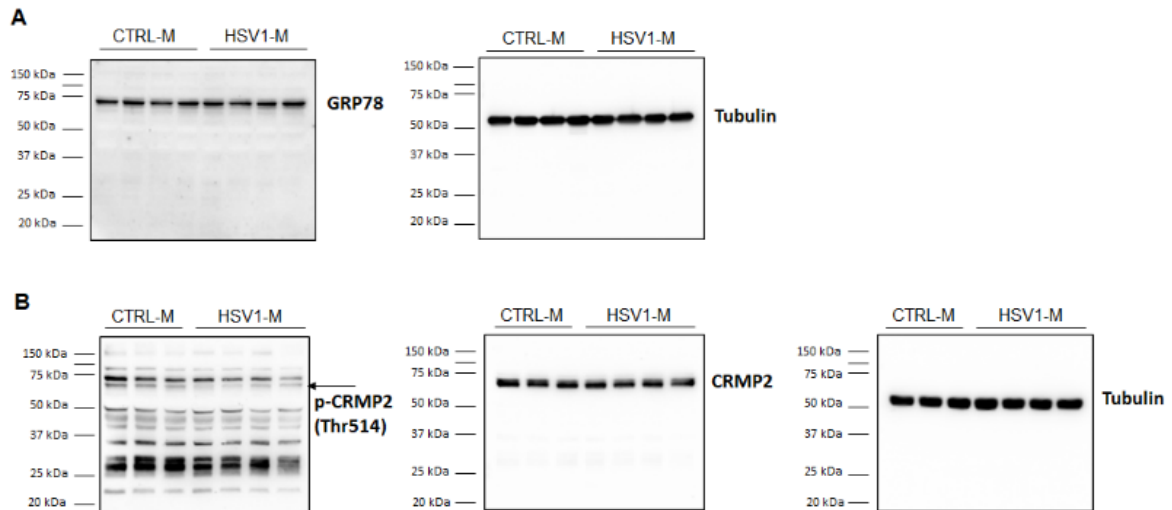

**Figure 2.** Full-length images of western blots shown in Figure 4 (A) and 6 (B). p-CRMP2 staining was performed after probing with other antibodies. The arrow indicates the specific band showing CRMP2 phosphorylation at Thr514.

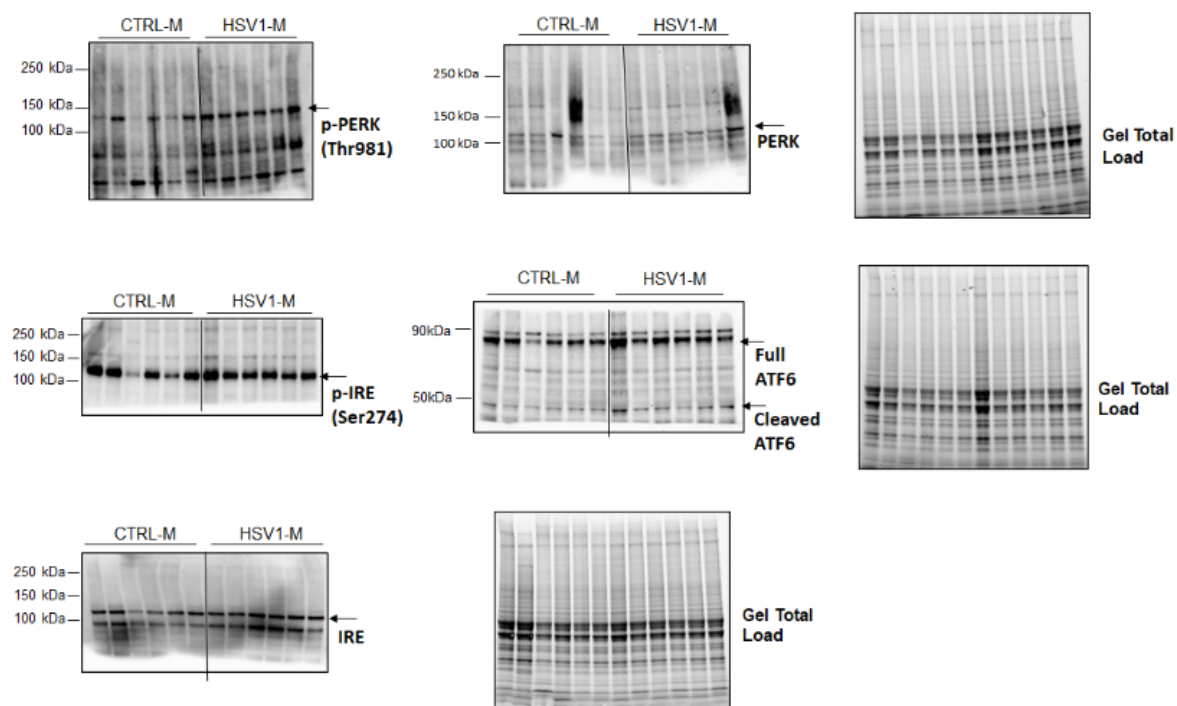

**Figure 3.** Full-length images of western blots shown in Figure 5.
